# Supplementary material for: Selective fluorescent probes for live-cell monitoring of sulphide
Source: Springer Nature journal article supplement (doi:10.1038/ncomms1506), 2011-10-11
Supplement: 41467_2011_BFncomms1506_MOESM1_ESM.mol [file 41467_2011_BFncomms1506_MOESM1_ESM.mol]

  ChemDraw09271110452D

 33 36  0  0  0  0  0  0  0  0999 V2000
   -1.3391    2.2621    0.0000 C   0  0  0  0  0  0  0  0  0  0  0  0
   -1.3391    1.4371    0.0000 C   0  0  0  0  0  0  0  0  0  0  0  0
   -0.6246    1.0246    0.0000 C   0  0  0  0  0  0  0  0  0  0  0  0
    0.0898    1.4371    0.0000 C   0  0  0  0  0  0  0  0  0  0  0  0
    0.0898    2.2621    0.0000 C   0  0  0  0  0  0  0  0  0  0  0  0
   -0.6246    2.6746    0.0000 C   0  0  0  0  0  0  0  0  0  0  0  0
    0.8043    2.6746    0.0000 C   0  0  0  0  0  0  0  0  0  0  0  0
   -0.6246    3.4996    0.0000 C   0  0  0  0  0  0  0  0  0  0  0  0
   -0.6246    0.1996    0.0000 C   0  0  0  0  0  0  0  0  0  0  0  0
   -1.2921   -0.2853    0.0000 C   0  0  0  0  0  0  0  0  0  0  0  0
   -1.0371   -1.0699    0.0000 C   0  0  0  0  0  0  0  0  0  0  0  0
   -0.2121   -1.0699    0.0000 N   0  0  0  0  0  0  0  0  0  0  0  0
    0.0428   -0.2853    0.0000 N   0  0  0  0  0  0  0  0  0  0  0  0
    0.8274   -0.0304    0.0000 C   0  0  0  0  0  0  0  0  0  0  0  0
   -1.5213   -1.7362    0.0000 C   0  0  0  0  0  0  0  0  0  0  0  0
    1.4405   -0.5824    0.0000 C   0  0  0  0  0  0  0  0  0  0  0  0
    2.2251   -0.3274    0.0000 C   0  0  0  0  0  0  0  0  0  0  0  0
    2.3967    0.4795    0.0000 C   0  0  0  0  0  0  0  0  0  0  0  0
    1.7836    1.0316    0.0000 C   0  0  0  0  0  0  0  0  0  0  0  0
    0.9990    0.7766    0.0000 C   0  0  0  0  0  0  0  0  0  0  0  0
   -2.3417   -1.6500    0.0000 C   0  0  0  0  0  0  0  0  0  0  0  0
   -2.8267   -2.3174    0.0000 C   0  0  0  0  0  0  0  0  0  0  0  0
   -2.4911   -3.0711    0.0000 C   0  0  0  0  0  0  0  0  0  0  0  0
   -1.6706   -3.1574    0.0000 C   0  0  0  0  0  0  0  0  0  0  0  0
   -1.1857   -2.4899    0.0000 C   0  0  0  0  0  0  0  0  0  0  0  0
   -3.6471   -2.2312    0.0000 F   0  0  0  0  0  0  0  0  0  0  0  0
   -1.3351   -3.9110    0.0000 F   0  0  0  0  0  0  0  0  0  0  0  0
    1.5180    2.2626    0.0000 C   0  0  0  0  0  0  0  0  0  0  0  0
    2.2295    2.6734    0.0000 C   0  0  0  0  0  0  0  0  0  0  0  0
   -1.3372    3.9110    0.0000 O   0  0  0  0  0  0  0  0  0  0  0  0
    2.2295    3.4933    0.0000 O   0  0  0  0  0  0  0  0  0  0  0  0
    2.9396    2.2634    0.0000 O   0  0  0  0  0  0  0  0  0  0  0  0
    3.6471    2.6719    0.0000 C   0  0  0  0  0  0  0  0  0  0  0  0
  1  2  2  0      
  2  3  1  0      
  3  4  2  0      
  4  5  1  0      
  5  6  2  0      
  6  1  1  0      
  5  7  1  0      
  6  8  1  0      
  3  9  1  0      
  9 10  2  0      
 10 11  1  0      
 11 12  2  0      
 12 13  1  0      
 13  9  1  0      
 13 14  1  0      
 11 15  1  0      
 14 16  2  0      
 16 17  1  0      
 17 18  2  0      
 18 19  1  0      
 19 20  2  0      
 20 14  1  0      
 15 21  2  0      
 21 22  1  0      
 22 23  2  0      
 23 24  1  0      
 24 25  2  0      
 25 15  1  0      
 22 26  1  0      
 24 27  1  0      
  7 28  2  0      
 28 29  1  0      
  8 30  2  0      
 29 31  2  0      
 29 32  1  0      
 32 33  1  0      
M  END
